# Supplementary material for: Changes in trunk posture and muscle responses in standing during pregnancy and postpartum
Source: PLoS One. 2018 Mar 27;13(3):e0194853. doi: 10.1371/journal.pone.0194853 (PMC5870985; doi:10.1371/journal.pone.0194853)
Supplement: S1 Data — (XLSX) [file pone.0194853.s001.xlsx]

## Sheet: SPSS
	lumbar_bipe	hip_bipe	media_ESLD_bipe_norm	media_BF_bipe_norm	lumbar_bipe_POST	hip_bipe_POST	media_ESLD_bipe_norm_POST	media_BF_bipe_norm_POST
1	-34.2658	18.6077	8.14247	0.387304	-27.362	24.6134	0.904545	0.457939
1	-41.4261	32.8355	11.4281	1.55902	-35.1809	31.763	2.45929	0.176952
1	-56.5773	37.7518	2.09319	15.4227	-54.4884	36.9852	0.800764	5.93861
1	-32.0037	27.726	5.71044	1.43102	-36.431	24.81	2.70721	0.212162
1	-39.4805	20.8753	7.88049	0.766667	-36.0478	18.7136	0.58592	2.71593
1	-36.0716	29.8845	6.15946	2.85647	-27.9892	22.1407	3.12833	4.35783
1	-45.0641	28.5392	2.76375	0.1745	-32.3536	28.1028	1.12853	4.21294
1	-36.8021	18.3281	6.00971	3.25418	-33.883	18.7067	8.89384	0.18534
1	-40.8898	31.9692	5.93732	2.08697	-48.1057	37.5097	2.09164	1.37267
1	-15.8196	12.6654	7.03232	14.3362	-28.2772	23.2946	1.23185	0.148323
1	-39.546	23.9293	8.34923	0.094431	-34.3319	27.7307	1.44299	0.267883
1	-34.6541	28.7682	13.9965	6.61993	-29.4394	28.0625	8.90732	6.8383
1	-31.8498	25.1592	5.27189	7.3055	-28.2719	21.0769	2.90232	0.29537
1	-28.65	19.9163	5.05762	0.660961	-29.2331	17.3837	2.18632	2.31316
1	-21.1558	15.1692	6.63049	12.0915	-17.0318	11.2465	2.54696	0.243272
1	-24.0775	13.613	4.29056	0.803164	-28.8154	15.0506	1.72218	1.49448
1	-30.5076	23.6709	4.11505	0.397141	-35.3468	26.9455	2.7322	0.14895
1	-19.375	17.7207	6.58624	9.27603	-40.026	16.815	0.454982	6.75379
1	-37.3531	25.8941	6.11962	0.1855	-21.5607	20.1873	0.626966	0.40537
1	-22.0847	11.8684	2.31822	0.130301	-24.2582	14.1374	0.493528	0.12263
1	-34.9717	26.4667	4.85051	4.36487	-28.0984	17.7805	2.07557	0.303359
1	-44.4178	32.047	2.58026	4.26298	-40.6702	26.9062	1.20545	2.06639
1	-41.2644	25.5124	1.89632	0.332231	-35.9497	16.494	2.36925	0.253577
1	-36.9131	22.3908	0.840551	0.508819	-36.4521	20.0294	1.2577	0.885402
1	-22.6509	14.9913	0.513653	0.503342	-28.0157	15.2828	0.789179	0.174462
1	-36.8323	26.7095	1.99062	2.18701	-51.9981	27.711	1.33482	0.960232
1	-9.49646	3.20416	1.04879	5.80972	-38.6916	33.8476	1.10974	1.6165
1	-18.5438	7.77258	1.20365	5.47413	-27.805	13.0532	1.41023	0.67071
1	-44.2701	30.7609	1.25718	3.29391	-44.5793	28.2426	1.44618	1.26958
1	-23.3143	10.278	5.74714	2.12167	-27.6519	13.9866	4.11539	0.145824
1	-32.4584	14.0367	1.52131	0.353455	-25.6734	15.624	0.721306	0.145964
1	-17.7787	18.8635	2.52939	2.8085	-51.7216	40.3867	3.23488	1.17094
1	-31.9793	13.2191	0.862341	1.2629	-48.0924	22.6545	0.658215	0.313677
1	-14.6456	11.454	4.32546	3.21726	-19.8256	15.923	1.60965	0.303414
mean	-31.6821	21.2529	4.61941	3.42177	-33.9311	22.7411	2.09662	1.43947
desvest	10.5122	8.2626	3.14017	4.0678	9.32437	7.55323	1.95231	1.93829
0	-25.5054	12.3624	1.24928	1.16115
0	-33.0125	26.1284	1.74117	0.903515
0	-27.0552	21.1828	1.66847	0.192139
0	-38.4694	22.2079	1.94239	1.79568
0	-21.0791	11.52	1.05113	0.366501
0	-45.6543	39.9211	3.49005	0.382431
0	-42.8428	29.4651	0.451727	0.981157
0	-27.8153	12.3419	0.658461	0.082154
0	-25.1707	22.0756	0.778781	0.47134
0	-35.8191	21.9908	4.07254	1.36022
0	-38.0057	20.7803	2.59085	0.430291
0	-34.2025	26.3056	1.99761	0.236628
0	-50.1585	36.3854	2.08312	0.399868
0	-39.8937	38.6953	1.72363	0.256282
0	-25.0821	15.3112	1.30372	0.125716
0	-47.5938	32.609	0.787858	3.14978
0	-47.2804	31.277	2.9028	0.769598
0	-38.063	27.321	0.719102	4.75763
0	-38.2642	25.0315	1.71921	1.63495
0	-31.0916	14.4807	0.830913	0.531782
0	-28.7354	26.175	0.956773	0.223079
0	-36.9281	27.6203	4.72881	0.725533
0	-45.6734	32.8097	5.93832	7.43801
0	-24.7294	22.5896	1.08103	0.254058
0	-32.0536	13.6052	0.556639	0.463574
0	-21.0653	16.352	2.10989	0.535105
0	-17.1853	12.907	1.23574	3.35036
0	-14.2496	11.6665	7.14752	1.03078
0	-35.1151	22.6808	7.428	1.76367
0	-38.4694	22.2079	1.94239	1.79568
0	-22.0531	9.07601	2.17503	0.316525
0	-31.2831	23.0152	1.05293	0.616563
0	-22.8551	15.1264	7.43811	1.11403
0	-32.7548	16.1939	3.1931	1.05418
mean	-32.8003	22.3358	2.37492	1.19618
desvest	9.19181	8.23423	1.99099	1.50361
